# Supplementary material for: Animal Protein Intake Is Associated with General Adiposity in Adolescents: The Teen Food and Development Study
Source: MDPI journal article supplement (doi:10.3390/nu12010110), 2019-12-31
Supplement: s1 [file s1]

**Table S1. Categories of protein foods, their descriptions, and corresponding FFQ food items**

| <b>Protein Food Category</b> | <b>Description</b>                                          | <b>FFQ Food Items</b>                                                                                                                                                                                                                                                                                                                                                      |
|------------------------------|-------------------------------------------------------------|----------------------------------------------------------------------------------------------------------------------------------------------------------------------------------------------------------------------------------------------------------------------------------------------------------------------------------------------------------------------------|
| <b>Red Meat</b>              | Red meat                                                    | Red meats (e.g. beef, lamb, etc); red meat patties, steak, and meatloaf; red meat in hamburgers, sandwiches, burritos, taco, quesadilla, pizza, spring rolls, nachos; in mixed dishes such as vegetable dishes, pasta, rice dishes, legume dishes.                                                                                                                         |
| <b>White meat</b>            | White meat/Poultry                                          | Chicken; chicken patties, meatloaf or meatballs, nuggets; chicken or turkey in sandwiches, sandwiches, burritos, taco, quesadilla, pizza, spring rolls, nachos; in mixed dishes such as vegetable dishes, pasta, rice dishes, legume dishes                                                                                                                                |
| <b>Processed Meat</b>        | Processed white or red meat                                 | Links and franks/frankfurters, bacon, hotdogs in sandwiches; corndogs                                                                                                                                                                                                                                                                                                      |
| <b>Fish</b>                  | Fish                                                        | Fish (all kinds); fish in burritos, tacos, and sushi/kimbap                                                                                                                                                                                                                                                                                                                |
| <b>Dairy</b>                 | Dairy, whey and casein                                      | Cow's milk or goat's milk, cheese (all types or in cheeseburgers, sandwiches, burritos, taco, quesadilla, pizza, nachos), yogurt (all kinds), Ice cream (all kinds, sorbet or sherbet), cow's milk-based beverages (smoothies, shakes, frapuccino and lattes) and cream/sour cream/cream based sauces/cream based soups; whey and casein protein isolate in meat analogues |
| <b>Egg</b>                   | Egg                                                         | Egg (any style) in egg salads, sandwiches, tacos, spring rolls, vegetarian sushi/kimbap                                                                                                                                                                                                                                                                                    |
| <b>Grain</b>                 | Grains/Cereals                                              | Bread (all kinds), pasta/noodles, rice, cereals (all kinds/cold and hot, including granola and breakfast bars), and pancakes                                                                                                                                                                                                                                               |
| <b>Gluten</b>                | Gluten, gluten extracts                                     | Gluten and gluten extract in meat analogues                                                                                                                                                                                                                                                                                                                                |
| <b>Soy</b>                   | Soybeans, soy beverages, soy extracts, soy dairy substitute | Tofu, tempeh, edamame, soy milk (all kinds) and soy milk-based beverages (smoothies, shakes, lattes), soy ice cream, soy yogurt, tofu soup, soy nuts                                                                                                                                                                                                                       |
| <b>Non-Soy Legumes</b>       | Non-soy legumes or beans                                    | Beans (all kinds) in meatless burgers/patties, burritos, tacos, nachos, , haystack; hummus; mixed bean soup, lentil/split pea soup                                                                                                                                                                                                                                         |
| <b>Nuts</b>                  | Nuts, seeds, nut butters                                    | Nut and nut butters; peanut butter in peanut butter sandwich                                                                                                                                                                                                                                                                                                               |
